# Supplementary material for: Corynebacterium accolens Releases Antipneumococcal Free Fatty Acids from Human Nostril and Skin Surface Triacylglycerols
Source: PubMed Central journal article supplement — mBio. 2016 Jan 5;7(1):e01725-15. doi: 10.1128/mBio.01725-15 (PMC4725001; doi:10.1128/mbio.01725-15), 2016-01-05
Supplement: mbo006152617st1.pdf [file mbo006152617st1.pdf]

**Table S1.** Additional *C. accolens* strains tested for inhibition of *S. pneumoniae* 603

| <i>C. accolens</i>    | Inhibition of <i>S. pneumoniae</i> 603 |             |
|-----------------------|----------------------------------------|-------------|
| strain                | Triolein                               | Trilinolein |
| DSM44278 <sup>T</sup> | + <sup>a</sup>                         | +           |
| DSM44279              | +                                      | +           |

<sup>a</sup>Inhibition was observed using the TAG and strain indicated

*n*=3 for side-by-side cocultivation assays using triolein as the medium supplement

*n*=4 for membrane-based cocultivation assays using trilinolein as the medium supplement
