# Supplementary material for: Corynebacterium accolens Releases Antipneumococcal Free Fatty Acids from Human Nostril and Skin Surface Triacylglycerols
Source: PubMed Central journal article supplement — mBio. 2016 Jan 5;7(1):e01725-15. doi: 10.1128/mBio.01725-15 (PMC4725001; doi:10.1128/mbio.01725-15), 2016-01-05
Supplement: mbo006152617st2.pdf [file mbo006152617st2.pdf]

**Table S2.** Bacterial strains and plasmids used in this study.

| Bacterial strain or plasmid  | Characteristics                                                                                                    | Source or Reference |
|------------------------------|--------------------------------------------------------------------------------------------------------------------|---------------------|
| <i>C. accolens</i> strains   |                                                                                                                    |                     |
| KPL1818                      | wild type (primary human nostril isolate)                                                                          | This study          |
| DSM44278 <sup>1</sup>        | wild type (type strain)                                                                                            | DSMZ                |
| DSM44279                     | wild type                                                                                                          | DSMZ                |
| KPL2503                      | KPL1818 $\Delta lipS1$                                                                                             | This study          |
| KPL2504                      | KPL1818 $\Delta lipS1$ pCGL0243                                                                                    | This study          |
| KPL2505                      | KPL1818 $\Delta lipS1$ pLB502                                                                                      | This study          |
| KPL2478                      | KPL1818 pLB502                                                                                                     | This study          |
| KPL2489                      | KPL1818 pCGL0243                                                                                                   | This study          |
| <i>E. coli</i> strains       |                                                                                                                    |                     |
| KPL2499                      | NEB 5-alpha pLB502                                                                                                 | This study          |
| <i>S. pneumoniae</i> strains |                                                                                                                    |                     |
| 603                          | clinical isolate                                                                                                   | (1)                 |
| TIGR4                        | clinical isolate                                                                                                   | ATCC                |
| DBL5                         | clinical isolate                                                                                                   | (2)                 |
| WU2                          | clinical isolate                                                                                                   | (3)                 |
| DSM24048                     | clinical isolate                                                                                                   | DSMZ                |
| DSM11868                     | clinical isolate                                                                                                   | DSMZ                |
| Plasmids                     |                                                                                                                    |                     |
| pJSC232                      | A vector originally used to construct deletions in <i>Mycobacterium smegmatis</i>                                  | (4)                 |
| pSB121                       | pJSC232 derived vector containing <i>lipS1</i> in-frame-deletion with 1kb flanking regions                         | This study          |
| pCGL0243                     | <i>E. coli</i> – <i>Corynebacterium</i> shuttle vector                                                             | (5)                 |
| pLB502                       | pCGL0243 encoding His <sub>6</sub> -tagged LipS1 and its putative promoter region inserted at the <i>Sall</i> site | This study          |

## REFERENCES

1. **Malley R, Lipsitch M, Stack A, Saladino R, Fleisher G, Pelton S, Thompson C, Briles D, Anderson P.** 2001. Intranasal immunization with killed unencapsulated whole cells prevents colonization and invasive disease by capsulated pneumococci. *Infect Immun* **69**:4870-4873.
2. **Lu YJ, Leite L, Goncalves VM, Dias Wde O, Liberman C, Fratelli F, Alderson M, Tate A, Maisonneuve JF, Robertson G, Graca R, Sayeed S, Thompson**

- CM, Anderson P, Malley R.** 2010. GMP-grade pneumococcal whole-cell vaccine injected subcutaneously protects mice from nasopharyngeal colonization and fatal aspiration-sepsis. *Vaccine* **28**:7468-7475.
3. **Briles DE, Nahm M, Schroer K, Davie J, Baker P, Kearney J, Barletta R.** 1981. Antiphosphocholine antibodies found in normal mouse serum are protective against intravenous infection with type 3 *Streptococcus pneumoniae*. *Journal of Experimental Medicine* **153**:694-705.
4. **Converse SE, Cox JS.** 2005. A protein secretion pathway critical for *Mycobacterium tuberculosis* virulence is conserved and functional in *Mycobacterium smegmatis*. *J Bacteriol* **187**:1238-1245.
5. **Reyes O, Guyonvarch A, Bonamy C, Salti V, David F, Leblon G.** 1991. 'Integron'-bearing vectors: a method suitable for stable chromosomal integration in highly restrictive corynebacteria. *Gene* **107**:61-68.
