# Supplementary material for: Corynebacterium accolens Releases Antipneumococcal Free Fatty Acids from Human Nostril and Skin Surface Triacylglycerols
Source: PubMed Central journal article supplement — mBio. 2016 Jan 5;7(1):e01725-15. doi: 10.1128/mBio.01725-15 (PMC4725001; doi:10.1128/mbio.01725-15), 2016-01-05
Supplement: mbo006152617st3.pdf [file mbo006152617st3.pdf]

**Table S3.** Primers designed for this study

| Primer | Sequence 5' to 3' <sup>a</sup>                               | Use                                                                                                           |
|--------|--------------------------------------------------------------|---------------------------------------------------------------------------------------------------------------|
| oKL516 | gcggatccagctgcagCCGCCGGCAATTCGCCTG                           | Gibson assembly for deletion of <i>lipS1</i> with insertion of random scar sequence into pJSC232 PstI site    |
| oKL517 | gggtgccctcgagtgcATGAGAACCCCTGAAGCCACAAG                      |                                                                                                               |
| oKL518 | gttctcatgcactcgagggcaccggagctTAAATACTGCTCCCTTACGCC           |                                                                                                               |
| oKL519 | aagcttcgaattctgcaGGTTGGGTTTCGATGCGCT                         |                                                                                                               |
| oKL520 | CAAGGACAATTAACAGTTAACAAATAA                                  | amplifying the fragment insertion site in pJSC232                                                             |
| oKL521 | CGTTTCCCGTTGAATATGGCTCAT                                     |                                                                                                               |
| oKL522 | TCCCTTCAGTGAGTTAAAGCGGC                                      | Deletion control of <i>lipS1</i> in <i>C. accolens</i> 1818                                                   |
| oKL523 | TCAGGTCCGCTGGTGGCAAT                                         |                                                                                                               |
| oKL556 | actggagcttctcatcggt                                          | sequencing LipS1- mutant                                                                                      |
| oKL557 | ttgaaaacaggatgacgat                                          |                                                                                                               |
| oKL508 | catggacgcgtgacggtcgacACTCCTTGCCAAACCGGT                      | Gibson assembly for cloning <i>lipS1</i> into pCGL0243                                                        |
| oKL509 | aaagcttatcgataccggtcgacttaatggatggtgatggtgCTGGCTTCCCTCCTCGTG |                                                                                                               |
| oKL381 | CTTGGGAGAAGCGGCAGGGCGG                                       | amplifying pCGL0243 multiple cloning site in <i>E. coli</i> ; sequencing <i>lipS1</i> insertion in pLB502     |
| oKL382 | GGTTCACGTAGTGGGCCATCGCCCT                                    |                                                                                                               |
| oKL562 | CGGGGAAGAACAGTATGTC                                          | amplifying pCGL0243 multiple cloning site in <i>C. accolens</i> ; sequencing <i>lipS1</i> insertion in pLB502 |
| oKL563 | GGCCGCTCTAGAACTAGTG                                          |                                                                                                               |
| oKL244 | GCAGAATAAATGATCCGTCGAG                                       | sequencing <i>lipS1</i> insertion in pLB502                                                                   |
| oKL422 | CCTTCTACCCTCGACGGCTC                                         |                                                                                                               |
| oKL423 | CAGCAGTAGAGTACGGAATCAC                                       |                                                                                                               |
| oKL547 | CATCAGTCAAATCAATTCAG                                         |                                                                                                               |
| oKL558 | GGTCCGCTAATCCTTGAG                                           |                                                                                                               |
| oKL559 | TCTGTACTCGGATACGGG                                           |                                                                                                               |
| oKL561 | GGCGATGGCGAAAATCATC                                          |                                                                                                               |
