# Supplementary figures and images for: Corynebacterium accolens Releases Antipneumococcal Free Fatty Acids from Human Nostril and Skin Surface Triacylglycerols
Source: PubMed Central journal article supplement — mBio. 2016 Jan 5;7(1):e01725-15. doi: 10.1128/mBio.01725-15 (PMC4725001; doi:10.1128/mbio.01725-15), 2016-01-05

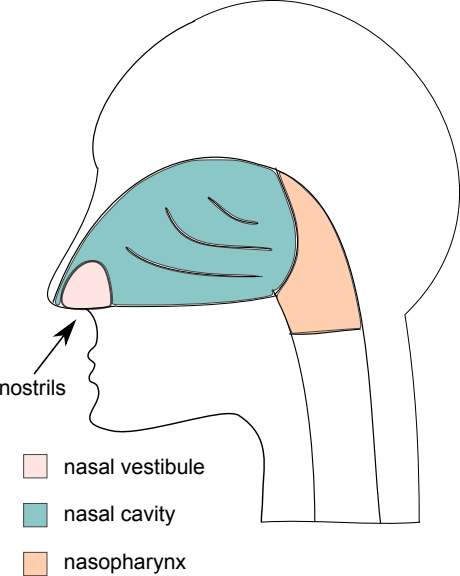

Supplement: mbo006152617sf1.pdf [file mbo006152617sf1.pdf]

**A. *Streptococcus***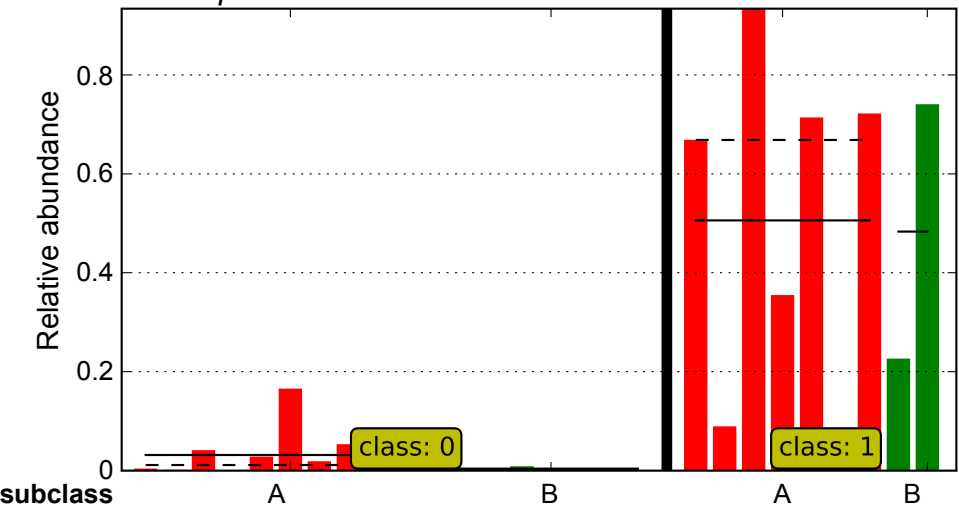**B. *Dolosigranulum***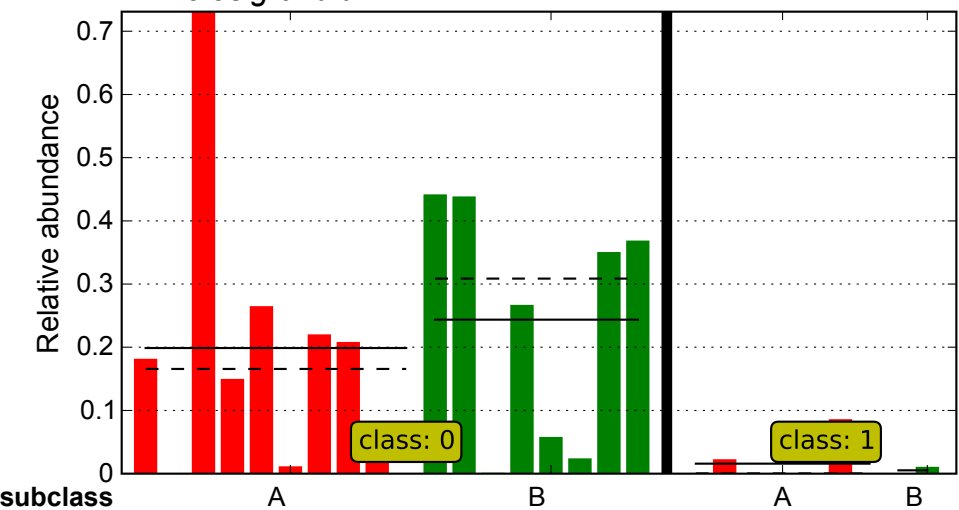**C. *Corynebacterium***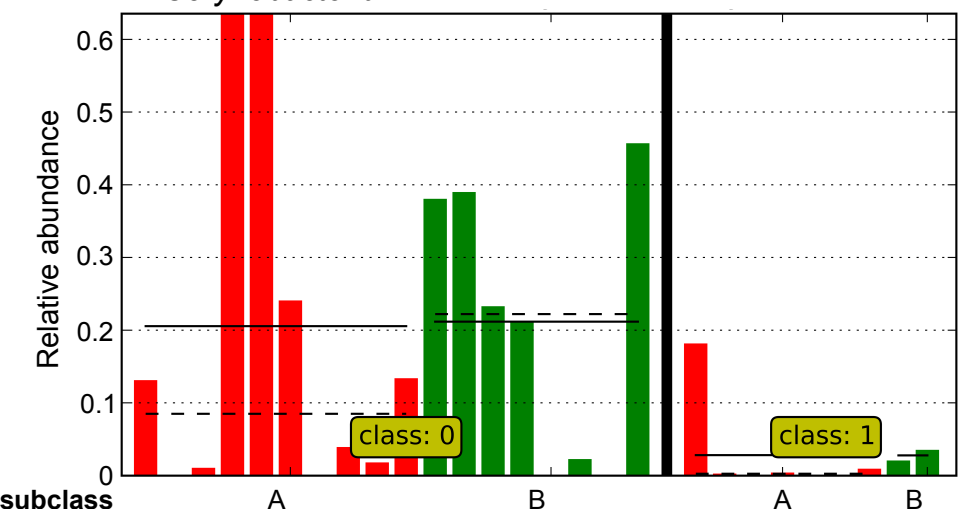

Supplement: mbo006152617sf2.pdf [file mbo006152617sf2.pdf]

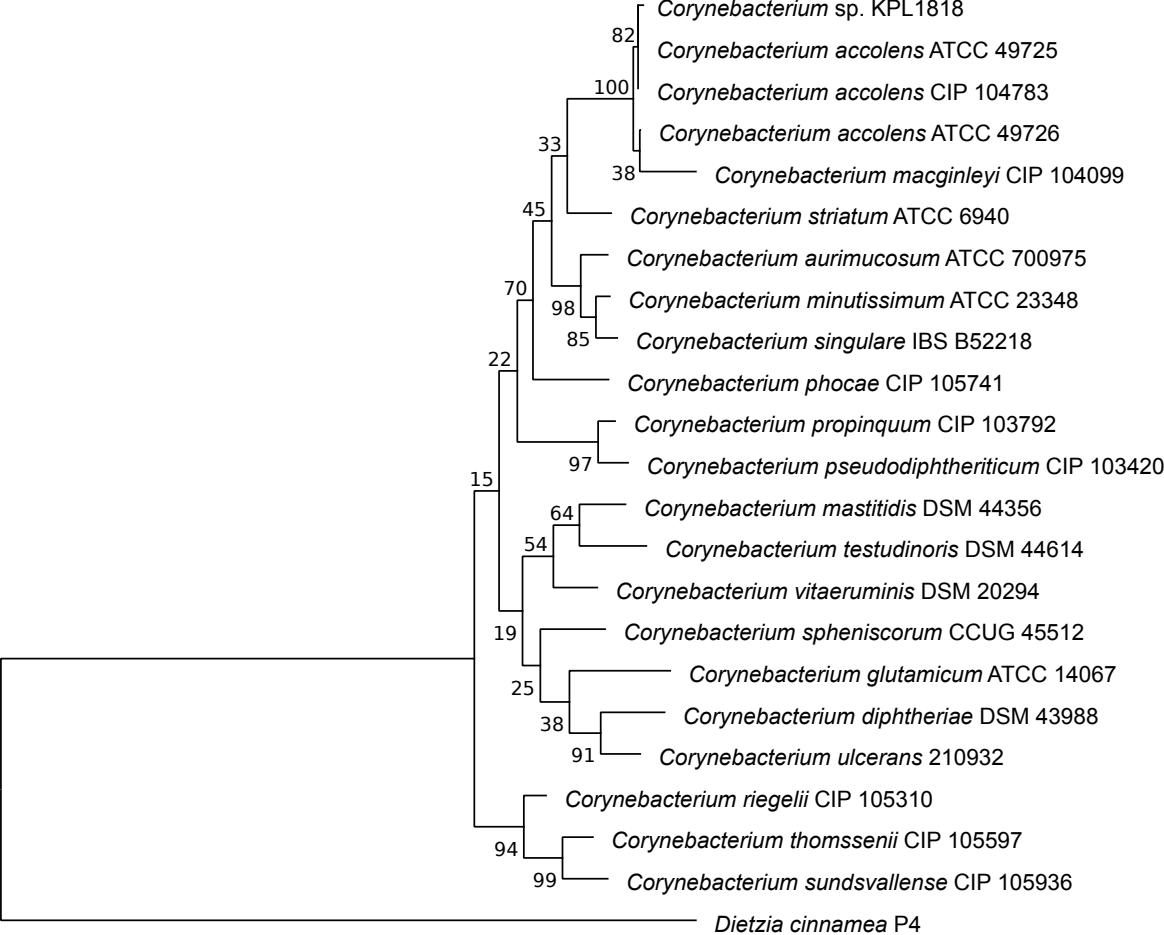

0.2

Supplement: mbo006152617sf3.pdf [file mbo006152617sf3.pdf]

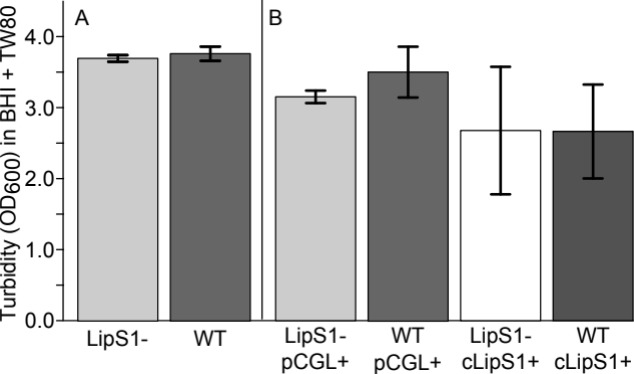

Supplement: mbo006152617sf4.pdf [file mbo006152617sf4.pdf]

predicted signal sequence    G-X-S-X-G motif    His<sub>6</sub> tag    stop codon

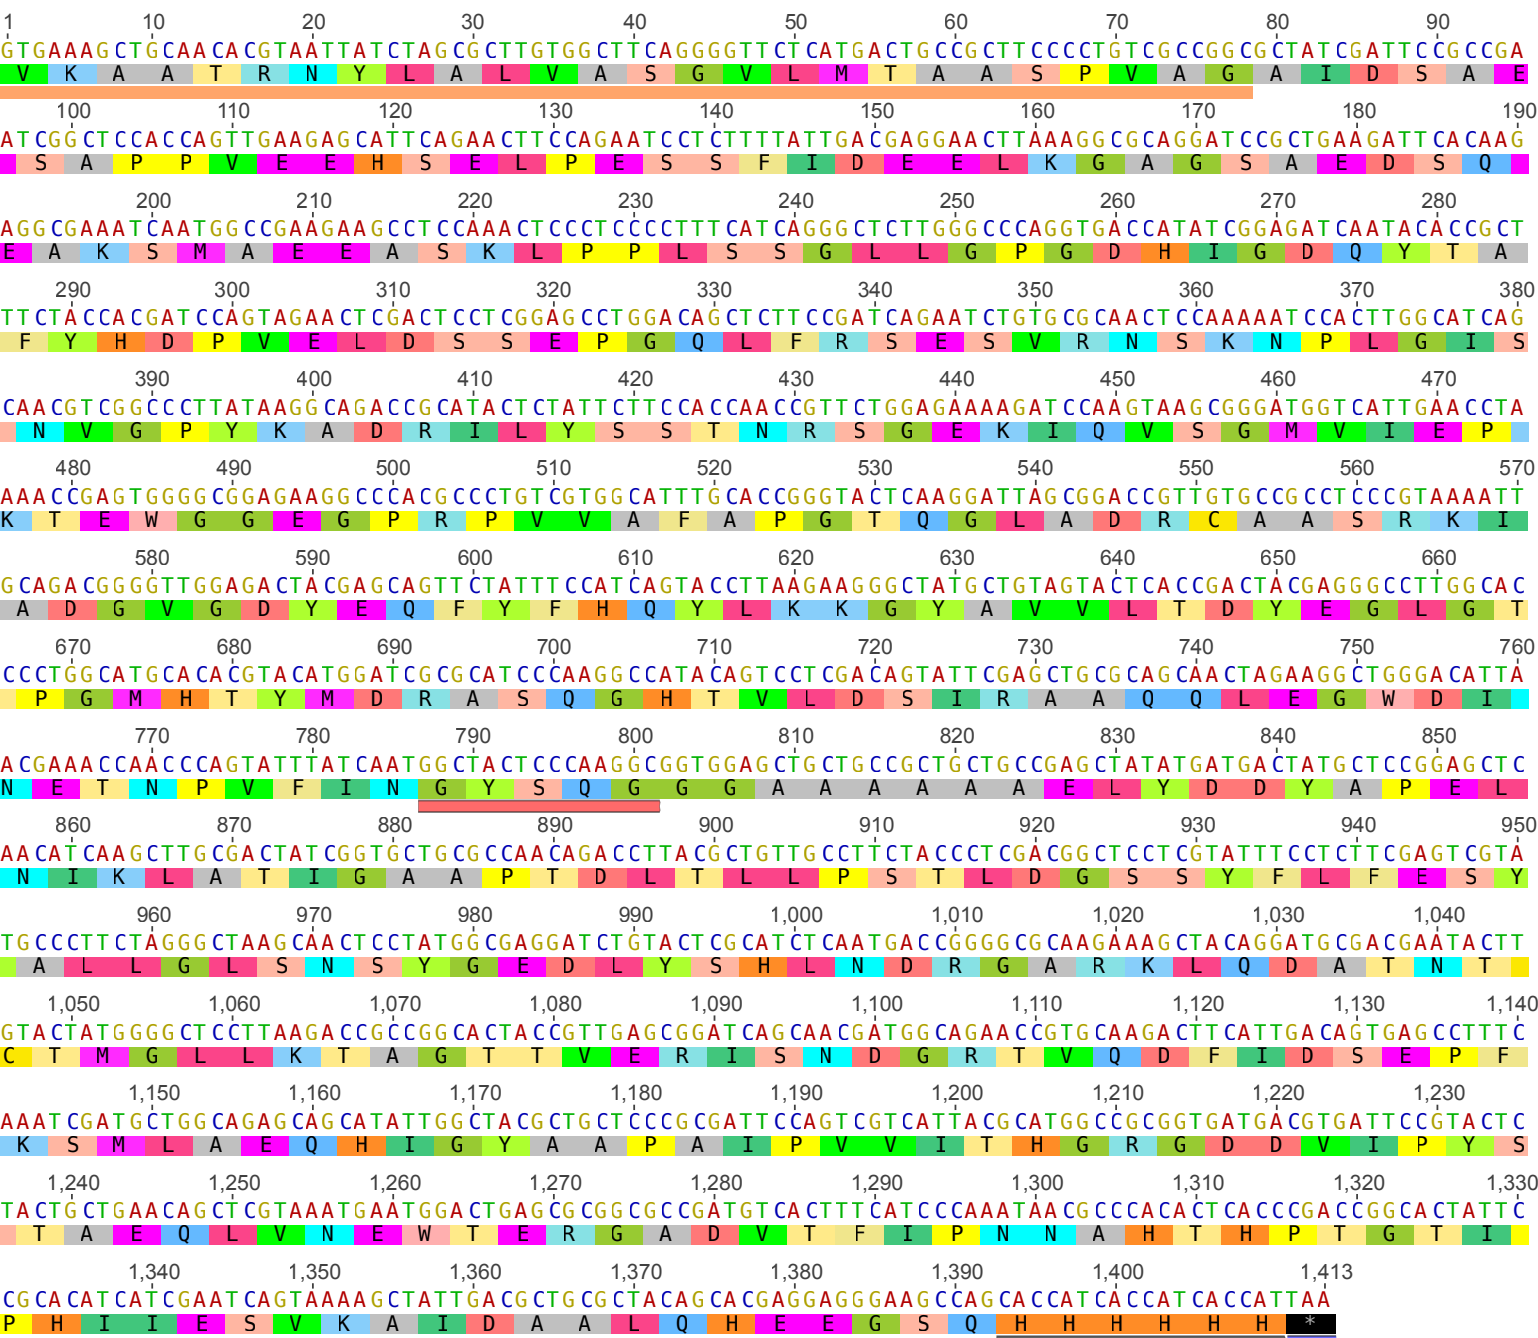

Supplement: mbo006152617sf5.pdf [file mbo006152617sf5.pdf]
